# 2nd Annual Meeting of the International Continence Society

Paris, 15th–17th September 1972

Chairman: PIERRE ABOULKER, Paris  
Organising Secretary and Editor of Proceedings: ERIC S. GLEN, Glasgow

## Index

|                                                                                                                                                                                           |     |
|-------------------------------------------------------------------------------------------------------------------------------------------------------------------------------------------|-----|
| FRIMODT-MØLLER, C.; GAMMELGAARD, P. A.; HALD, T., and OLESEN, K. P. (Copenhagen): Urological Investigation in Women with Recurrent Incontinence Following Gynecological Surgery . . . . . | 163 |
| CALDWELL, K. P. S. (Exeter): Clinical Use of Recording Nappy . . . . .                                                                                                                    | 172 |
| JAMES, E. D. and FLACK, F. C. (Exeter): Assessment of Recording Nappy . . . . .                                                                                                           | 174 |
| ALEXANDER, S. and ROWAN, D. (Glasgow): Clinical and Hydrodynamic Evaluation of Urinary Incontinence in Women. Clinical Aspects and Analysis of Results . . . . .                          | 176 |
| STANTON, S. L.; HILL, D. W., and WILLIAMS, J. P. (London): Electromyography of the Detrusor Muscle. Preliminary Communication . . . . .                                                   | 182 |
| ARNOLD, E. P. (London): Cystometry – Postural Effects in Incontinent Women . . . . .                                                                                                      | 185 |
| WARRELL, D. W. and CLOW, W. M. (Manchester): Critical Appraisal of Cystometry in Evaluation of Bladder Function . . . . .                                                                 | 187 |
| KIESSWETTER, H. (Wien): Das Urethraldruckprofil. Unter Medikamenten, Östrogenen, bei neurogenen Störungen und bei Stressinkontinenz (The Urethral Pressure Profile) . . . . .             | 190 |
| EDWARDS, L. and MALVERN, J. (London): Studies of Intra-Urethral Pressures in Normal and Incontinent Women . . . . .                                                                       | 205 |
| GLEN, E. S. (Glasgow): Intra-Urethral Pressure Profile and Stimulation Results in Urinary Incontinence . . . . .                                                                          | 207 |
| HOPKINSON, B. R. (Birmingham): The Birmingham Continence Aid . . . . .                                                                                                                    | 211 |
| TRONTELJ, J. V.; JANKO, M.; GODEC, C.; RAKOVEC, S., and TRONTELJ, M. (Ljubljana): Electrical Stimulation for Urinary Incontinence. A Neurophysiological Study . . . . .                   | 213 |
| COLLINS, C. D. (Bristol): Intermittent Electrical Stimulation . . . . .                                                                                                                   | 221 |
| VEREecken, R. L. (Leuven): Experience with Vaginal and Anal Pacemakers . . . . .                                                                                                          | 222 |
| MERRIL, D. C. and CONWAY, C. J. (Minneapolis, Minn.): Clinical Experience with the Mentor Bladder Stimulator. Preliminary Report . . . . .                                                | 224 |
| CALDWELL, K. P. S. (Exeter): Electrical Stimulation . . . . .                                                                                                                             | 225 |
| STOCKAMP, K. and SCHREITER, F. (Mainz): Function of the Posterior Urethra in Ejaculation and its Importance for Urine Control . . . . .                                                   | 226 |

|                                                                                                                                                                                                    |     |
|----------------------------------------------------------------------------------------------------------------------------------------------------------------------------------------------------|-----|
| DRÖES, J. T. P. M.; ULDEN, B. M. VAN; DONKER, P. J., and LANDSMEER, J. W. F. (Leiden): Studies of the Urethral Musculature in the Human Fetus, Newborn and Adult . . . . .                         | 231 |
| CASS, A. S. and SPENCE, B. S. (St. Paul, Minn.): Urinary Incontinence in Myelomeningocele . . . . .                                                                                                | 235 |
| SUSSET, J. G.; ZINNER, N., and ARCHIMBAUD, J. P. (Sherbrooke/Leiden/Lyon): Differential Sacral Blocks and Selective Neurotomies in the Treatment of Incomplete Upper Motor Neuron Lesion . . . . . | 236 |
